# Comparative analysis of three sperm DNA damage assays and sperm nuclear protein content in couples undergoing assisted reproduction treatment

L. Simon, L. Liu, K. Murphy, S. Ge, J. Hotaling, K.I. Aston, B. Emery, and D.T. Carrell\*

Andrology and IVF Laboratory, Department of Surgery (Urology), University of Utah, Salt Lake City, UT 84108, USA

\* Correspondence address. 675 Arapeen Drive, Suite 201, Salt Lake city, UT 84109, USA. Tel: +1-801-587-3772; Fax: +1-801-581-6127; E-mail: douglas.carrell@hsc.utah.edu

Submitted on November 12, 2013; resubmitted on December 30, 2013; accepted on January 27, 2014

**STUDY QUESTION:** Is there an association between sperm DNA damage, measured by three different assays, sperm nuclear protein content and clinical outcomes in assisted reproduction treatment (ART)?

**SUMMARY ANSWER:** Sperm DNA damage measured by terminal deoxynucleotidyltransferase-mediated dUTP nick-end labelling (TUNEL) and the Comet assay were significantly associated with ART outcomes in our single institution study.

**WHAT IS KNOWN ALREADY:** Abnormal protamine expression is known to be associated with sperm DNA damage and male infertility. A number of studies have shown a significant relationship between sperm DNA damage and ART outcomes. To date, there are no large studies providing direct comparisons of DNA damage tests within the same study population. Thus, the prognostic value for each method remains unknown.

**STUDY DESIGN, SIZE, DURATION:** Cross-sectional study of 238 men from infertile couples undergoing ART at the University Center for Reproductive Medicine, Utah, USA, between April 2011 and March 2013.

**PARTICIPANTS/MATERIALS, SETTING, METHODS:** Sperm from men undergoing ART were tested for DNA damage using the alkaline Comet assay, TUNEL and flow cytometric chromatin evaluation (FCCE) assays. Histone retention was analysed using the aniline blue staining method, whereas protamine content (proteins P1 and P2) and ratio were analysed using acid urea gel electrophoresis. The prognostic value of each sperm DNA test to predict clinical pregnancy was calculated.

**MAIN RESULTS AND THE ROLE OF CHANCE:** Histone retention was associated with sperm DNA damage ( $P < 0.001$ ), reduced embryo quality ( $P = 0.005$ ) and clinical pregnancies ( $P < 0.001$ ). The mean percentage of sperm with DNA damage was significantly higher in sperm from non-pregnant couples compared with that from pregnant couples, as measured by TUNEL assay ( $15.04 \pm 1.16\%$  versus  $8.79 \pm 0.56\%$ ;  $P < 0.001$ ) and alkaline Comet assay ( $72.79 \pm 2.49\%$  versus  $55.86 \pm 2.29\%$ ;  $P < 0.001$ ). There was no association between clinical pregnancies and DNA fragmentation index measured by FCCE ( $12.97 \pm 1.46$  versus  $14.93 \pm 1.65$ ;  $P = 0.379$ ). Of the protamine parameters analysed, only the P1/P2 ratio was associated with sperm count ( $P = 0.013$ ), men's age ( $P = 0.037$ ), maturity ( $P = 0.049$ ) and blastocyst quality ( $P = 0.012$ ). Histone retention and sperm DNA damage measured by Comet and TUNEL assays were associated with fertilization rate ( $P < 0.05$ ), embryo quality ( $P < 0.05$ ) and implantation rate ( $P < 0.05$ ).

**LIMITATIONS, REASONS FOR CAUTION:** A potential drawback of this study is that it is cross-sectional. Generally in such studies there is more than one variable that could cause the effect. Analysing sperm is one part of the equation; there are also a number of female factors that have the potential to influence ART outcomes. Therefore, given the large and well-established role of female factors in infertility, normal sperm DNA integrity and protamination do not necessarily ensure clinical pregnancy in ART. Thus, female factors can reduce the prognostic value of sperm DNA tests. Further, our use of native semen instead of prepared sperm may have iatrogenically increased the DNA damage.

**WIDER IMPLICATIONS OF THE FINDINGS:** Alteration in sperm nuclear protein affects sperm DNA integrity. Further, with the current dataset, TUNEL and Comet assays appeared more predictive of ART success than FCCE.

**STUDY FUNDING/COMPETING INTEREST(S):** No personal or direct financial support has been received for any of this work. The authors declare no competing interests.

**TRIAL REGISTRATION NUMBER:** N/A.

**Key words:** assisted reproduction treatment outcomes / Comet assay / histone retention / sperm DNA damage / TUNEL assay

## Introduction

Male infertility impacts 50% of infertile couples. Semen analyses, while helpful, may fail to identify subtle sperm defects that influence assisted reproduction treatment (ART) success, such as condensation defects or DNA strand breaks (Alizadeh *et al.*, 2009). Although morphology is often taken as a surrogate for sperm DNA quality, teratozoospermia has not been shown to impact IVF and ICSI outcomes (Hotaling *et al.*, 2011) and we currently do not have the ability to analyse the genetic potential of an individual spermatozoa without destroying it (Wang *et al.*, 2012). In the past two decades, a broad range of sperm-specific biomarkers have been associated with male infertility and have been described as useful tests to assess sperm function (Aitken, 2006; Breznik *et al.*, 2013) but none of them have had a significant or meaningful impact on clinical management. To date, only sperm nuclear protein and sperm DNA integrity have been shown to have the potential to discriminate between infertile and fertile men (Pacey, 2012).

A number of studies have shown that men with normal semen profiles may still be infertile; abnormal sperm DNA may underlie some of this variation (Host *et al.*, 1999; Saleh *et al.*, 2003; Lee *et al.*, 2010). The sperm genome contributes one half of the offspring's genetic material. Hence, sperm with normal genetic material is essential to obtain a successful pregnancy during natural conception as well as during ART. Considering sperm DNA integrity as a biomarker for male fertility, numerous studies have shown that a high level of sperm DNA damage is associated with an increased time to conception, lower fertilization rates, impaired embryo cleavage, higher miscarriage rates and recurrent pregnancy loss after ART (Evenson *et al.*, 1999, 2007; Spano *et al.*, 2000; Morris *et al.*, 2002; Carrell *et al.*, 2003; Zini *et al.*, 2008; Lewis and Simon, 2010). Unlike somatic cells where DNA is packed in the form of nucleohistone, in sperm 85% of histones are replaced by protamine proteins. Sperm with abnormally low levels of protamine have a higher retention of histone (Aoki *et al.*, 2006a; Alizadeh *et al.*, 2009) which may make the sperm vulnerable to DNA damage (Zhang *et al.*, 2006).

Protamine deficiency and poor protamine packing in sperm is observed in infertile men, suggesting that defective spermatogenesis may lead to alteration in the relative histone-to-protamine ratio in these men (Rosenbusch, 2000; Nasr-Esfahani *et al.*, 2008a,b). In addition, a number of studies have shown a close relationship between abnormal sperm protamination and sperm DNA damage (Rosenbusch, 2000; Nasr-Esfahani *et al.*, 2004, 2005; Torregrosa *et al.*, 2006; Angelopoulou *et al.*, 2007; Plastira *et al.*, 2007; Nili *et al.*, 2009; Tarozzi *et al.*, 2009; Tavalaei *et al.*, 2009; Chiamchanya *et al.*, 2010), supporting the belief that poor chromatin remodelling is a major cause of sperm DNA damage (Bianchi *et al.*, 1993; Zini *et al.*, 2001; Aoki *et al.*, 2006b).

The discrepancies present in the literature suggest that the type of assay used to measure sperm DNA damage may influence the detection of associations with ART outcomes (Huang *et al.*, 2005; Payne *et al.*, 2005; Boe-Hansen *et al.*, 2006; Borini *et al.*, 2006; Muriel *et al.*, 2006;

Bakos *et al.*, 2007; Frydman *et al.*, 2008; Lin *et al.*, 2008; Simon *et al.*, 2010, 2011a). Of the three commonly used assays, the alkaline Comet assay and the terminal deoxynucleotidyltransferase-mediated dUTP nick-end labelling (TUNEL) assay directly measure the level of DNA damage in sperm, whereas flow cytometric chromatin evaluation (FCCE) using the acridine orange staining method (SCSA<sup>®</sup> protocol) indirectly measures the susceptibility of DNA to damage. In this study we investigated the correlation between protamine levels and DNA integrity, and associations between the three sperm DNA damage assays and their ability to predict successful pregnancy after ART.

## Materials and Methods

### Subjects

Men presenting at the University of Utah IVF laboratory, Salt Lake City, UT, USA, for infertility treatment between April 2011 and March 2013 were invited to participate in this study ( $n = 238$ ). All subjects gave written informed consent for participation in this study, and the project was approved by the University of Utah Institutional Review Board. Semen samples were obtained after a recommended 2–5 days of sexual abstinence. All samples were subjected to a conventional light microscopic semen analysis to determine liquefaction, semen volume, sperm concentration, total sperm output and motility according to World Health Organization (WHO) recommendations (World Health Organization, 1999). Following liquefaction, a portion of the sample was used for semen analysis, and at least 100 sperm were analysed. Sperm concentration was determined using a Makler chamber, motility according to WHO guidelines, and morphology following the standard hematoxylin-eosin staining method.

### ART procedures

Ovarian stimulation was performed using standard techniques. Oocytes were obtained using ultrasound-guided, transvaginal aspiration. Fertilization was achieved by standard IVF ( $n = 89$  cases), ICSI ( $n = 149$  cases) or a combination of standard IVF and ICSI ( $n = 27$ ). Standard IVF involved insemination of metaphase II oocytes with 100 000–200 000 progressively motile sperm in a 100  $\mu$ l drop of human tubal fluid medium. ICSI was performed using microtool sperm immobilization and injection. Resulting embryos were cultured for 3–5 days after oocyte retrieval in human tubal fluid medium, and then transferred to the uterus. All embryos were included in the determination of the patient's mean embryo score (Carrell *et al.*, 1999). Infertility diagnoses for couples included in the study were female factor infertility (40%), male factor infertility (28%) and unexplained factor infertility (32%).

### Alkaline Comet assay

Sperm DNA damage was assessed using an alkaline single-cell gel electrophoresis (Comet) assay as modified previously by Hughes *et al.* (1997) and Donnelly *et al.* (1999). Sperm was considered damaged or normal based on the presence or absence of a visible Comet tail, respectively. Fifty to 100 Comets were scored per sample.

## TUNEL assay

Assessment of sperm DNA fragmentation was performed using the TUNEL assay as described by Chohan et al. (2006). The assay was performed using the fluorescein *in situ* cell death detection kit following the manufacturer's guidelines (Roche Diagnostics GmbH, Mannheim, Germany). A total of 200 sperm per individual slide was evaluated using fluorescence microscopy by the same examiner.

## FCCE assay

The FCCE was performed based on the sperm chromatin structure assay protocol using the acridine orange stain. An aliquot of unprocessed semen (20–100  $\mu$ l) was diluted to a concentration of  $1-2 \times 10^6$  sperm/ml with TNE buffer (0.01 mol/l Tris-HCl, 0.15 mol/l NaCl and 1 mmol/l EDTA, pH7.4). This cell suspension was treated with an acid detergent solution (pH 1.2) containing 0.1% Triton X-100, 0.15 mol/l NaCl and 0.08 mol/l HCl for 30 s, and then stained with 6 mg/l purified acridine orange (Poly-sciences, Inc., Warrington, PA, USA) in a phosphate-citrate buffer, pH 6.0. Cells were analysed using a flow cytometer (Accuri C6, Accuri Cytometers, Inc., Ann Arbor, MI, USA), equipped with an air-cooled argon ion laser.

## Aniline blue staining

For assessment of histone retention, unprocessed semen was smeared on a glass slide, air-dried and fixed for 10 min with 4% glutaraldehyde in phosphate-buffered saline. Staining (5 min) was performed using a 5% aniline blue solution that was diluted in 4% acetic acid (approximately pH 3.5). Subsequently, slides were rinsed with water, air-dried and analysed with a bright-field microscope. Overall, 200 sperm were analysed per individual slide. Sperm were classified as previously described (Boitrelle et al., 2011).

## Protamine analysis

**Purification of nuclear proteins:** Sperm nuclear proteins were extracted as previously described from all patients enrolled in the study to determine protamine content and P1/P2 ratios (Carrell and Liu, 2001). **Preparation of the human protamine standard:** A human protamine standard was prepared as previously described (Mengual et al., 2003). The  $r^2$  value of the regression curve was  $\geq 0.96$  for each gel run. **Quantification of protamine:** Acetic acid-urea gel electrophoresis was performed as previously described by Carrell and Liu (2001).

## Statistical analysis

Data were analysed using the Statistical Package for the Social Sciences (SPSS 18) for Windows (SPSS, Inc., Chicago, IL, USA). The threshold value for sperm DNA damage for the alkaline Comet assay was 18% undamaged or 82% damaged sperm [established in this study based on the odds ratio (OR) value], 10% for TUNEL [previously described by our group (Chohan et al., 2006)] assay and 27% DNA fragmentation index (DFI) for FCCE (Bungum et al., 2004). Our primary outcome was the effect of DNA damage [analysed by Comet ( $n = 238$ ), TUNEL ( $n = 235$ ) and FCCE ( $n = 102$ )] on clinical pregnancy, evaluated by logistic regression. A clinical pregnancy with fetal heart beat was confirmed by ultrasound on 5 weeks after embryo transfer. The key outcome from the model derived above is individual posterior probabilities of a positive clinical pregnancy. We tested the performance of the prognostic model by calculating the area under the receiver operating characteristic (ROC) curve. Secondary outcomes were fertilization rate, embryo quality (on Days 2, 3 and 5), the percentage of embryos developing to blastocyst and percentage arrested.

The fertilization rate was calculated as the percentage of all fertilized oocytes with two pronuclei for IVF ( $n = 89$ ) and ICSI ( $n = 149$ ). The embryo quality was calculated based on the number of blastomeres and the degree of fragmentation; when a patient had more than one embryo, a

mean value was used. Relationships between sperm DNA damage and fertilization and embryo outcomes were compared using the Spearman rank correlation test. Associations between conventional semen parameters and DNA damage were also assessed using the Spearman rank correlation test. To compare the prognostic ability of the different sperm DNA damage tests, we ran logistic regression models with pregnancy (yes/no) as the outcome and with each of the three tests individually as explanatory variables. From these, we estimated thresholds where the predicted probability of a positive pregnancy was equal to 0.1 (ED10). ORs and their 95% confidence intervals (CIs) were computed based on these threshold values. Sensitivities and specificities were calculated above and below the threshold values, together with the ROC and 95% CI for ROC. IVF micro-drop and ICSI treatment groups were combined for the analysis.

P1/P2 ratios and protamine content (P1, P2 and P1 + P2) in the native sperm were presented as mean  $\pm$  SE. Histone retention was expressed as low (no visible stain) and high ( $> 50\%$  stain). Spearman's rank correlation coefficient was used to analyse the relationship between the protamine and histone parameters with semen parameters and sperm DNA damage. The Kruskal-Wallis nonparametric test was used to analyse categories of men's age ( $\leq 34$ , 35–38 and  $\geq 39$  years) with the protamine and histone parameters. Analysis of variance with Duncan's *post hoc* test was used to associate categories of fertilization rate ( $\geq 70\%$ , good;  $< 70\%$ , low), embryo quality, P1 content (0.15–0.25  $\mu$ g, normal;  $< 0.15$  and  $> 0.25$   $\mu$ g, abnormal), P2 content (0.15–0.25  $\mu$ g, normal;  $< 0.15$  and  $> 0.25$   $\mu$ g, abnormal), total P1 + P2 content (0.30–0.50  $\mu$ g, normal;  $< 0.30$  and  $> 0.50$   $\mu$ g, abnormal), protamine ratio (0.8–1.0, normal;  $< 0.8$  and  $> 1.0$ , abnormal) and histone retention (low and high) with sperm DNA damage (Castillo et al., 2011; Simon and Lewis, 2011).

## Results

### Comparison of conventional semen profiles from couples that achieved a pregnancy with couples that were unsuccessful following ART

No significant differences between groups were observed in semen volume, total sperm count, normal head morphology and percentage progressive motility. However, couples with unsuccessful pregnancy had a higher sperm concentration than successful couples (mean  $\pm$  SE: 104.53  $\pm$  7.90 versus 84.87  $\pm$  5.27;  $P = 0.033$ ; Table I).

### Correlations between conventional semen parameters and men's age with sperm DNA damage

Sperm DNA damage measured by TUNEL and FCCE assays was associated with semen parameters. However, DNA damage measured by the Comet assay did not correlate with any of the semen parameters (Table II).

### Correlations between the three sperm DNA damage measurement assays

The TUNEL assay was associated with the Comet ( $r^2 = 0.126$ ,  $P < 0.001$ ) and FCCE ( $r^2 = 0.109$ ,  $P = 0.001$ ) assays. There was no correlation observed between Comet and FCCE assay ( $r^2 = 0.006$ ,  $P = 0.426$ ).

**Table I** Demographic data for couples undergoing assisted reproduction treatment (ART).

|                                                         | Pregnant         | Non-pregnant     | CI              | P-value |
|---------------------------------------------------------|------------------|------------------|-----------------|---------|
| Cycles included (n) <sup>a</sup>                        | 131              | 104              | –               | –       |
| Female age (years)                                      | 32.69 ± 0.46     | 34.25 ± 0.54     | 0.17 to 2.95    | 0.028   |
| Oocytes retrieved                                       | 14.44 ± 0.53     | 13.67 ± 0.56     | –3.30 to 0.76   | NS      |
| Oocytes inseminated                                     | 11.89 ± 0.48     | 11.21 ± 0.50     | –2.05 to 0.70   | NS      |
| Oocytes fertilized (2 pronuclei)                        | 9.44 ± 0.36      | 8.41 ± 0.43      | –2.11 to 0.07   | NS      |
| IVF fertilization rate (n, %)                           | 44, 75.57 ± 2.45 | 42, 63.87 ± 2.86 | –19.16 to –4.24 | 0.002   |
| ICSI fertilization rate (n, %)                          | 87, 86.07 ± 1.80 | 61, 85.23 ± 2.12 | –6.35 to 4.67   | NS      |
| Embryos transferred                                     | 2.02 ± 0.04      | 2.05 ± 0.04      | –0.07 to 0.12   | NS      |
| Embryo quality (Day 2)                                  | 1.23 ± 0.05      | 1.15 ± 0.05      | –0.21 to 0.06   | NS      |
| Embryo quality (Day 3)                                  | 3.67 ± 0.01      | 3.39 ± 0.03      | –0.61 to 0.06   | NS      |
| Blastocyst quality (Day 5)                              | 3.71 ± 0.12      | 3.56 ± 0.14      | –0.22 to 0.51   | NS      |
| Blastocyst developed (%)                                | 61.48 ± 1.90     | 57.05 ± 2.12     | –10.15 to 1.30  | NS      |
| Blastocyst degenerated (%)                              | 4.24 ± 0.83      | 7.36 ± 3.12      | –2.26 to 8.52   | NS      |
| Blastocyst arrested (%)                                 | 34.99 ± 1.92     | 39.07 ± 2.15     | –1.71 to 9.88   | NS      |
| Men's age (years)                                       | 34.44 ± 0.55     | 35.77 ± 0.59     | –0.26 to 2.93   | NS      |
| Abstinence time (days)                                  | 4.02 ± 0.27      | 4.08 ± 0.36      | –0.95 to 0.84   | NS      |
| Semen volume (ml)                                       | 3.52 ± 0.15      | 3.32 ± 0.15      | –0.61 to 0.22   | NS      |
| Sperm concentration (10 <sup>6</sup> ml <sup>–1</sup> ) | 84.87 ± 5.27     | 104.53 ± 7.90    | 1.56 to 37.75   | 0.033   |
| Total sperm count (10 <sup>6</sup> )                    | 276.84 ± 18.49   | 309.77 ± 22.30   | –23.68 to 89.54 | NS      |
| Progressive motile (%)                                  | 23.01 ± 1.17     | 26.50 ± 1.73     | –0.49 to 7.48   | NS      |
| Normal head (%)                                         | 28.36 ± 1.08     | 27.94 ± 1.26     | –3.67 to 2.84   | NS      |

<sup>a</sup>Embryo transfers were not performed in three patients owing to clinical complications. Values expressed as mean ± SE, CI: confidence interval.

**Table II** Correlation between semen parameters, men's age and sperm DNA damage.

| Semen parameters     | Comet assay (n = 238)             | TUNEL assay (n = 235)             | FCCE assay (n = 102)             |
|----------------------|-----------------------------------|-----------------------------------|----------------------------------|
| Semen volume         | $r = 0.019$ ,<br>$P = \text{NS}$  | $r = 0.092$ ,<br>$P = \text{NS}$  | $r = 0.154$ ,<br>$P = \text{NS}$ |
| Sperm concentration  | $r = -0.062$ ,<br>$P = \text{NS}$ | $r = -0.133$ ,<br>$P = 0.043$     | $r = -0.319$ ,<br>$P = 0.001$    |
| Total sperm output   | $r = -0.054$ ,<br>$P = \text{NS}$ | $r = -0.101$ ,<br>$P = \text{NS}$ | $r = -0.231$ ,<br>$P = 0.019$    |
| Progressive motility | $r = -0.004$ ,<br>$P = \text{NS}$ | $r = -0.159$ ,<br>$P = 0.015$     | $r = -0.490$ ,<br>$P < 0.001$    |
| Normal morphology    | $r = -0.068$ ,<br>$P = \text{NS}$ | $r = -0.211$ ,<br>$P = 0.002$     | $r = -0.290$ ,<br>$P = 0.004$    |
| Men's age            | $r = 0.076$ ,<br>$P = \text{NS}$  | $r = 0.083$ ,<br>$P = \text{NS}$  | $r = 0.128$ ,<br>$P = \text{NS}$ |

TUNEL, terminal deoxynucleotidyltransferase-mediated dUTP nick-end labelling; FCCE, flow cytometric chromatin evaluation.

### Correlations between sperm DNA damage and fertilization rate following ART

There was a decrease in fertilization rate as Comet DNA damage increased in the IVF microdrop insemination group ( $r = -0.376$ ,

$P < 0.0001$ ), but not in the ICSI insemination group ( $r = -0.117$ ,  $P = 0.154$ ). When the fertilization rate was categorized into normal and abnormal DNA damage groups (based on the 82% abnormal Comet threshold value), sperm DNA damage above the threshold value resulted in significantly reduced fertilization rates after IVF and ICSI insemination methods (Fig. 1). There was a decrease in fertilization rates as TUNEL DNA damage increased in the IVF microdrop insemination group ( $r = -0.263$ ,  $P = 0.015$ ), but not in the ICSI insemination group ( $r = -0.001$ ,  $P = 0.988$ ). The results of the FCCE assay did not correlate with fertilization rate.

### Correlations between sperm DNA damage and embryo development following ART

Sperm DNA damage measured by the Comet assay was negatively correlated with embryo quality measured on Day 2 ( $r = -0.198$ ,  $P = 0.002$ ), Day 3 ( $r = -0.357$ ,  $P < 0.001$ ), Day 5 ( $r = -0.247$ ,  $P = 0.001$ ) and percentage of blastocysts developed ( $r = -0.313$ ,  $P < 0.001$ ), and was positively correlated with percentage of blastocysts arrested ( $r = 0.358$ ,  $P < 0.001$ ). When the embryo quality was categorized into normal and abnormal DNA damage groups (82% threshold value), there was a reduction in embryo quality in the high DNA damage group on Day 3 and Day 5 (Fig. 2). There was also a significant difference in the percentage of blastocyst development and the percentage of embryos arrested between the groups (Fig. 3). There was no significant correlation between sperm DNA damage measured by the TUNEL and FCCE assays with any of the measured variables.

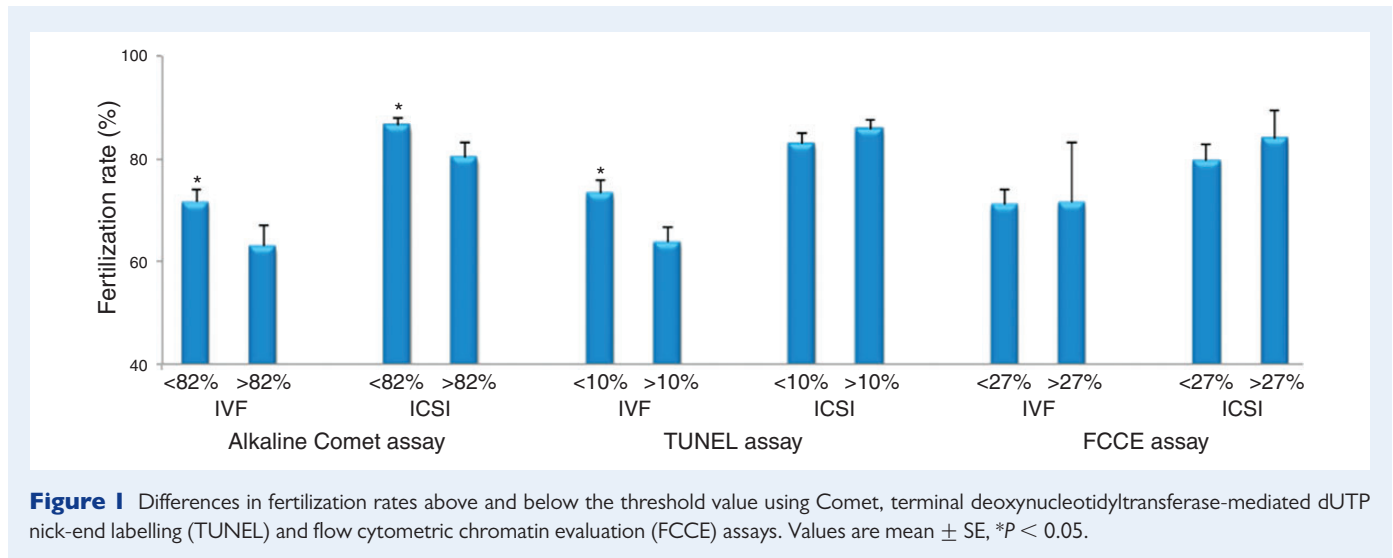

**Figure 1** Differences in fertilization rates above and below the threshold value using Comet, terminal deoxynucleotidyltransferase-mediated dUTP nick-end labelling (TUNEL) and flow cytometric chromatin evaluation (FCCE) assays. Values are mean  $\pm$  SE, \* $P < 0.05$ .

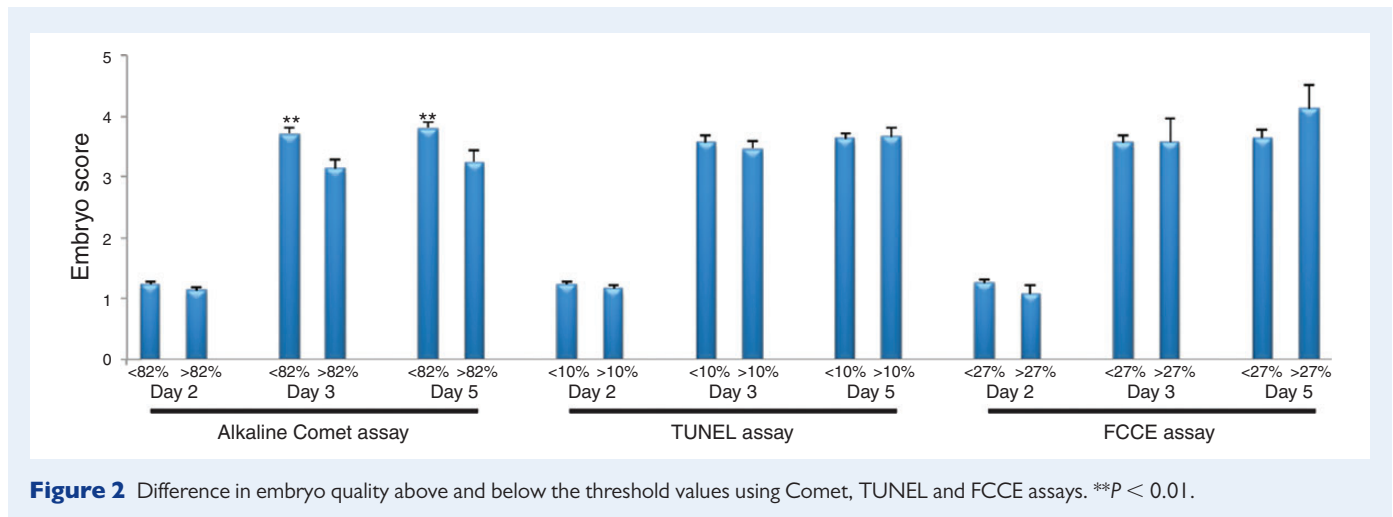

**Figure 2** Difference in embryo quality above and below the threshold values using Comet, TUNEL and FCCE assays. \*\* $P < 0.01$ .

## Correlations between sperm DNA damage and implantation rate following ART

The mean implantation rate was higher when sperm DNA damage was below the threshold value, compared with DNA damage above the threshold value using the Comet ( $1.04 \pm 0.07$  versus  $0.45 \pm 0.09$ ;  $P < 0.001$ ) and TUNEL ( $1.06 \pm 0.08$  versus  $0.62 \pm 0.09$ ;  $P < 0.001$ ) assays. No difference in implantation rate was observed when sperm DNA damage was above and below the threshold value of the FCCE assay ( $0.83 \pm 0.90$  versus  $0.62 \pm 0.77$ ;  $P = 0.413$ ). There was a decrease in sperm DNA damage when more than one embryo was implanted. This relationship was true with Comet and TUNEL assays, but not with FCCE assays (Table III).

## Sperm DNA damage of pregnant and non-pregnant couples following ART

Using the Comet and TUNEL assays, the mean percentage of sperm with DNA damage in the native semen was significantly higher in semen from non-pregnant couples ( $n = 100$ ) compared with that from pregnant

couples ( $n = 129$ ) undergoing ART (Table IV). However, no such difference was found using the DFI and high density sperm measured by the FCCE assay.

## Prognostic value of sperm DNA testing on ART outcomes

Using the threshold values, we calculated OR, ROC curve and relative risk to estimate ART success using the Comet, TUNEL and FCCE assays. The ORs to predict successful pregnancies after ART using the Comet and TUNEL assays were statistically significant, but this was not the case with FCCE assay (Fig. 4; Table V).

## Correlations between semen parameters and sperm DNA damage with histone retention

Histone retention was associated with semen volume and normal sperm morphology but not with sperm count and sperm motility. Histone retention was associated with sperm DNA damage measured by

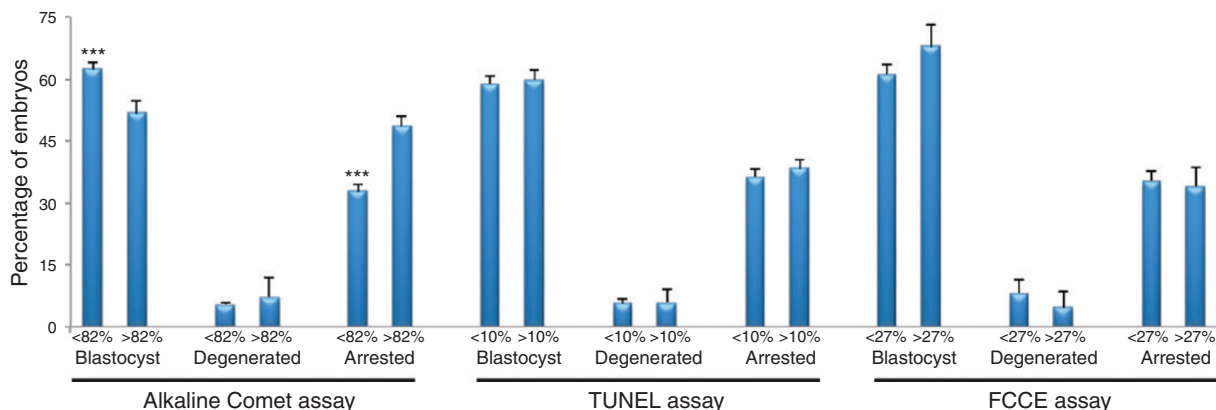

**Figure 3** Difference in blastocyst development, embryos degenerated and embryo arrest above and below the threshold value using Comet, TUNEL and FCCE assays. \*\*\* $P < 0.001$ .

**Table III** Comparison between sperm DNA damage and number of embryos implanted following embryo transfer.

| Implantation    | Comet assay                 | TUNEL assay                | FCCE assay   |
|-----------------|-----------------------------|----------------------------|--------------|
| No implantation |                             |                            |              |
| <i>n</i> (%)    | 100 (43.7)                  | 100 (44.3)                 | 46 (47.9)    |
| DNA damage      | 72.79 ± 2.48 <sup>a</sup>   | 15.23 ± 1.14 <sup>a</sup>  | 12.97 ± 1.45 |
| 1 embryo        |                             |                            |              |
| <i>n</i> (%)    | 61 (26.6)                   | 60 (27.4)                  | 25 (24.0)    |
| DNA damage      | 59.92 ± 2.96 <sup>b</sup>   | 8.98 ± 0.83 <sup>b</sup>   | 13.85 ± 2.83 |
| 2 embryo        |                             |                            |              |
| <i>n</i> , (%)  | 68 (28.4)                   | 66 (27.0)                  | 25 (26.0)    |
| DNA damage      | 51.34 ± 3.38 <sup>b,c</sup> | 8.72 ± 0.76 <sup>b,c</sup> | 14.02 ± 1.75 |

Values with different superscripts within each column are significantly different ( $P < 0.05$ ).

The values of DNA damage are expressed as mean ± SE.

Comet, TUNEL and FCCE assays (Table VI). There was no association between histone retention and men's age.

### Correlations between histone retention and ART outcomes

There was a significant correlation between histone retention and early embryo development on Day 2 and Day 3. An abnormally high level of histone retention was negatively associated with embryo quality on Day 2 ( $r = -0.190$ ,  $P = 0.009$ ) and Day 3 ( $r = -0.206$ ,  $P = 0.005$ ). Absence or low levels of histone retention were positively associated with Day 2 ( $r = 0.203$ ,  $P = 0.005$ ) and Day 3 ( $r = 0.204$ ,  $P = 0.005$ ) embryo development. However, histone retention was not associated with fertilization rate or blastocyst quality. Couples achieving clinical pregnancy had an increased percentage of sperm with normal histone and a decreased percentage of sperm with abnormal histone retention compared with couples with failed pregnancies (Fig. 5).

### Correlation between the protamine content and PI/P2 ratios with sperm DNA damage

A significant negative correlation between sperm DNA damage and protamine content was observed with protamine 1 ( $r = -0.247$ ,  $P = 0.009$ ), protamine 2 ( $r = -0.231$ ,  $P = 0.015$ ) and total PI + P2 protamines ( $r = -0.242$ ,  $P = 0.011$ ) based on the Comet assay. No significant correlations were observed between sperm DNA damage with protamine content based on TUNEL and FCCE assays. The PI and P2 content was lower in men with sperm DNA damage above the threshold value. However, no such correlations were observed with protamine ratio (Table VII; Fig. 6).

### Correlation between protamine content and PI/P2 ratios with semen parameters, histone retention and ART outcomes

Of the classic semen parameters, sperm motility was negatively associated with PI content ( $r^2 = -0.188$ ,  $P = 0.05$ ), and PI/P2 ratio was negatively associated with semen volume ( $r^2 = -0.257$ ,  $P = 0.007$ ) and sperm count ( $r^2 = -0.237$ ,  $P = 0.013$ ). A negative association was observed between men's age and PI/P2 ratio ( $r^2 = -0.211$ ,  $P = 0.037$ ). There was a positive correlation between normal histone retention and total (PI + P2) protamine content ( $r^2 = 0.189$ ;  $P = 0.049$ ). Protamine 2 level was positively associated with percentage of sperm with normal histone retention ( $r^2 = 0.188$ ;  $P = 0.050$ ). Protamine 2 content was positively associated with the percentage of blastocysts developed ( $r^2 = 0.207$ ;  $P = 0.050$ ). When protamine content and ratio were categorized into normal and abnormal categories, none of the protamine parameters were associated with ART outcomes.

## Discussion

This study associates the effect of sperm DNA damage measured by the Comet, TUNEL and FCCE assays and sperm nuclear protein content with ART outcomes in a cohort of 238 couples. Abnormalities in the sperm nuclear proteins, such as histones and protamines, were associated with sperm DNA damage, while a weak association was observed

**Table IV** Comparison of DNA damage between pregnant and non-pregnant couples after ART.

| DNA test | Pregnant couples (n = 129) | Non-pregnant couples (n = 100) | Difference (95% CI)    | P-value | ROC   |
|----------|----------------------------|--------------------------------|------------------------|---------|-------|
| Comet    | 55.40 ± 2.29               | 72.79 ± 2.49                   | 17.39 (-24.09, -10.70) | <0.001  | 0.648 |
| TUNEL    | 8.71 ± 0.56                | 15.23 ± 1.15                   | 6.52 (-8.88, -4.16)    | <0.001  | 0.629 |
| FCCE     | 14.93 ± 1.65               | 12.97 ± 1.46                   | -1.96 (-2.45, 6.37)    | 0.379   | 0.440 |

The values are expressed as mean ± SE.  
ROC, receiver operating characteristic curve.

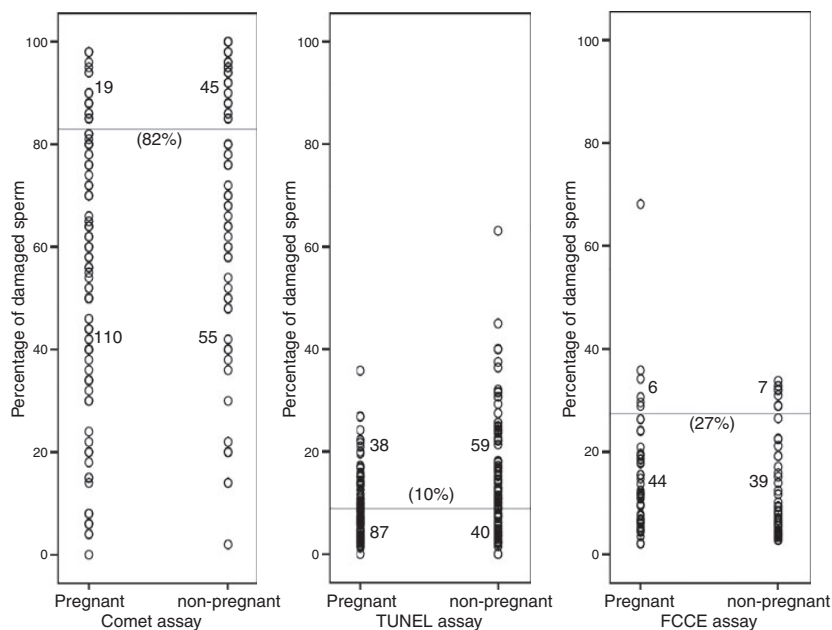

**Figure 4** DNA damage distribution measured by Comet, TUNEL and FCCE assays according to pregnancy outcome. The threshold values for each assay are represented by a line. The *n* values above and below the threshold values are provided.

**Table V** Prognostic value of sperm DNA damage in predicting clinical pregnancy after ART.

|                        | Comet assay        | TUNEL assay       | FCCE assay        |
|------------------------|--------------------|-------------------|-------------------|
| Threshold value (%)    | 82                 | 10                | 27                |
| Odds ratio (95% CI)    | 7.00 (3.62, 13.94) | 3.38 (1.87, 6.11) | 1.32 (0.36, 4.91) |
| Sensitivity (%)        | 85.27              | 69.60             | 88.00             |
| Specificity (%)        | 45.00              | 59.60             | 15.22             |
| PPV (%)                | 66.67              | 68.50             | 52.08             |
| NPV (%)                | 70.31              | 60.82             | 53.85             |
| Relative risk (95% CI) | 1.89 (1.51, 2.38)  | 1.72 (1.32, 2.25) | 1.04 (0.88, 1.22) |

PPV, positive predictive value; NPV, negative predictive value.

between nuclear proteins and ART outcomes. We noted a strong relationship between sperm DNA damage and ART outcomes (fertilization rate, embryo quality, blastocyst quality, implantation rate and pregnancy rate). The predictive power was significantly higher using the alkaline

Comet assay when compared with TUNEL and FCCE assays. There was a significant decrease in pregnancy rates in patients when the percentage of damaged sperm was above the threshold value of 82% measured by the Comet assay and 10% threshold value measured by TUNEL assay.

**Table VI** Correlations between semen parameters and DNA damage with histone retention.

| Parameters           | No histone retention        | Abnormal histone retention  |
|----------------------|-----------------------------|-----------------------------|
| Semen volume         | $r = -0.162, P = 0.027$     | $r = 0.166, P = 0.022$      |
| Sperm concentration  | $r = 0.110, P = \text{NS}$  | $r = -0.090, P = \text{NS}$ |
| Total sperm output   | $r = 0.060, P = \text{NS}$  | $r = -0.038, P = \text{NS}$ |
| Progressive motility | $r = 0.066, P = \text{NS}$  | $r = -0.059, P = \text{NS}$ |
| Normal morphology    | $r = 0.149, P = 0.045$      | $r = -0.145, P = 0.050$     |
| DNA damage – Comet   | $r = -0.329, P < 0.001$     | $r = 0.331, P < 0.001$      |
| DNA damage – TUNEL   | $r = -0.413, P < 0.001$     | $r = 0.424, P < 0.001$      |
| DNA damage – FCCE    | $r = -0.214, P = 0.032$     | $r = 0.203, P = 0.041$      |
| Men's age            | $r = -0.053, P = \text{NS}$ | $r = 0.046, P = \text{NS}$  |

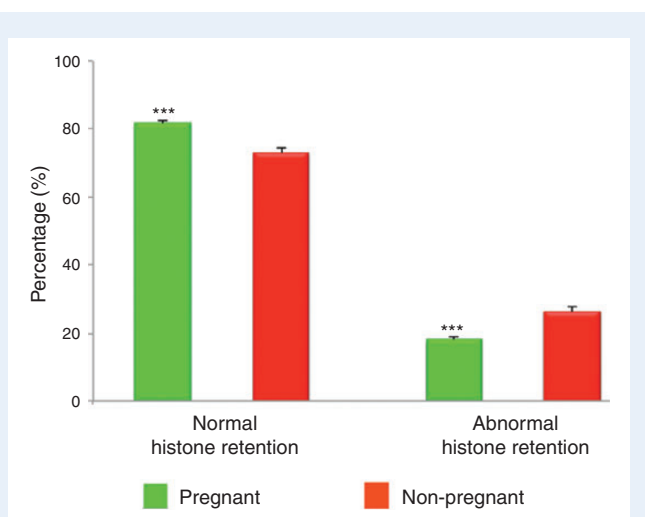**Figure 5** Bar chart showing difference in the percentage of sperm with histone retention between pregnant and non-pregnant couples following ART.  $P < 0.001$ .

A strong negative relationship was observed between sperm DNA damage analysed by TUNEL and FCCE assays and sperm concentration, progressive motility and normal morphology. The current literature shows mixed data, with some studies showing good association and others finding no correlations (Greco *et al.*, 2005; Nicopoulos *et al.*, 2005; Zini *et al.*, 2005; Ozmen *et al.*, 2007; Lin *et al.*, 2008; Nijs *et al.*, 2009; Tavalae *et al.*, 2009). Such controversies may arise due to variability in laboratory conditions, lack of standard protocols for DNA damage assays and inter- and intra-individual variability in the test parameters. In the current study 59% of ART patients showed normal semen profiles according to the WHO criteria. Of these patients 24% had DNA damage above the threshold value for the Comet assay ( $P = 0.105$ ), 40% had DNA damage above the threshold value for the TUNEL assay ( $P = 0.419$ ) and 9% had DNA damage above the threshold value for the FCCE assay ( $P = 0.225$ ).

Numerous techniques have been used to study sperm DNA abnormalities. These methods can be broadly classified into direct and indirect methods of assessment. In the Comet assay, DNA damage is quantified by measuring the displacement of broken DNA strands between the

comet head and tail when subjected to electrophoresis (Singh *et al.*, 1988). A unique and powerful feature of the Comet assay is that it can detect variable levels of DNA damage within individual cells and it is the only test that can show 100% of the sperm population being damaged (Ribas-Maynou *et al.*, 2013). We preferred the alkaline Comet assay to the neutral Comet assay as the latter measures only double-strand breaks, whereas the alkaline version measures both single- and double-strand breaks. Earlier studies (Simon *et al.*, 2010, 2011a,b, 2012) have established threshold values by calculating the mean of DNA strand breaks in 50 sperm. In this study the percentage of damaged sperm was analysed for the first time to estimate a threshold value 82% of sperm with Comet DNA damage. This threshold value was established based on the ART outcome (clinical pregnancy). A damaged sperm is characterized based on the presence of a Comet tail. The threshold value of 82% of sperm with DNA damage is comparable to the mean value of 56% Comet DNA damage published previously (Simon *et al.*, 2010). Previously, other quantitative parameters, such as tail length and olive tail moment, have also been used to assess the level of DNA damage in sperm (Morris *et al.*, 2002; Tomsu *et al.*, 2002).

The sensitivity of the alkaline Comet assay to identify a damaged sperm is very high compared with other assays. In this study, a threshold value of 82% for the Comet assay was established, significantly higher than the thresholds of 10% for TUNEL and 27% DFI for FCCE (Fig. 4). Such variations in threshold values can be explained by analysing the mean, median and range for each assay. The alkaline Comet assay yielded a mean (63.9%), median (66%) and range (0–100%) of sperm with DNA damage, whereas for the TUNEL assay the values were 11.4, 8.9 and 0–63%, and for the FCCE the values were 13.8, 9.9 and 0–66%, respectively. The alkaline Comet assay is the only sperm DNA damage assessment test so far to show a distribution of damaged sperm populations ranging from 0 to 100% (Ribas-Maynou *et al.*, 2013). Despite a high threshold value of 82% damaged sperm, 28% of the patients analysed had DNA damage above the threshold value. In this study, we used a 10% threshold value for the TUNEL assay based on a previous study in our laboratory (Chohan *et al.*, 2006), which identified the point at which the highest odds value to determine a clinical pregnancy was obtained.

Sperm DNA damage measured by the TUNEL assay resulted in a strong positive correlation with the Comet as well as FCCE assay. Similar observations were previously reported by Zini *et al.* (2001), Erenpreiss *et al.* (2004) and Chohan *et al.* (2006). A strong correlation



**Table VII** Effect of protamine (P1 and P2 proteins) parameters on sperm DNA damage. The values are expressed as percentage.

| Assay | Threshold value | (n) | P1/P2 ratio |         |      | P1 (ng) |      | P2 (ng) |      |
|-------|-----------------|-----|-------------|---------|------|---------|------|---------|------|
|       |                 |     | <0.8        | 0.8–1.0 | >1.0 | <200    | >200 | <200    | >200 |
| Comet | <82%            | 90  | 28          | 59      | 13   | 54      | 46   | 37      | 63   |
|       | >82%            | 22  | 23          | 50      | 27   | 73      | 27   | 55      | 45   |
| TUNEL | <10%            | 72  | 22          | 60      | 18   | 57      | 43   | 35      | 65   |
|       | >10%            | 40  | 35          | 53      | 12   | 65      | 35   | 50      | 50   |
| FCCE  | <27%            | 74  | 18          | 66      | 16   | 55      | 45   | 34      | 66   |
|       | >27%            | 10  | 10          | 50      | 40   | 70      | 30   | 60      | 40   |

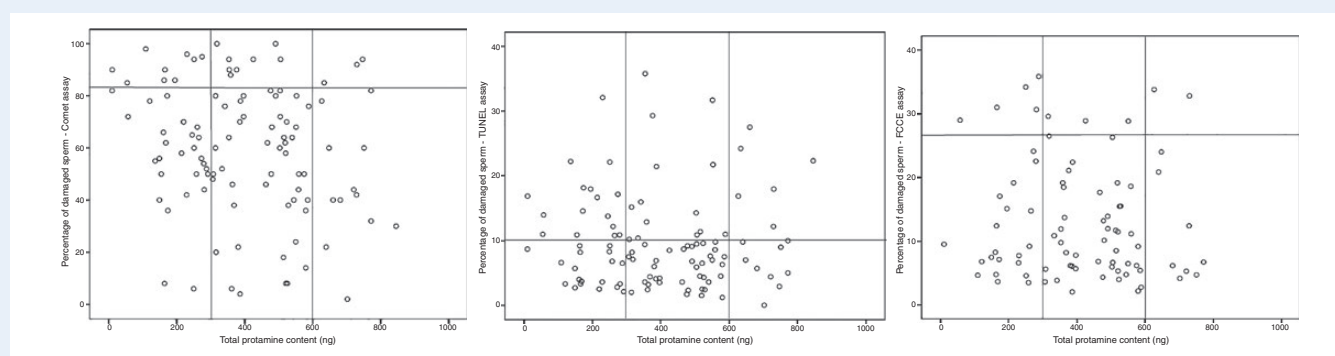**Figure 6** Correlation between DNA damage (% of damaged sperm) and total protamine content (P1 + P2). Vertical lines represent abnormally low and abnormally high levels of protamine. Horizontal lines represent the threshold value for each DNA damage assay.

between two parameters does not necessarily mean that both parameters are the same (Henkel et al., 2010). It is merely an indication that the two parameters are somehow related, and such a relationship can even be indirect. On the other hand, in this study the association between DFI measured by FCCE and the Comet assay is not only markedly weaker but also much less significant than has been previously reported. The difference between FCCE and the Comet assay is that the FCCE detects 'potential' DNA damage and the susceptibility to denaturation, while the Comet assay detects complete DNA damage. During the Comet protocol, the sperm is lysed and the nucleus is completely decondensed exposing the strand breaks present in the nuclear core. This concept also explains why thresholds for the Comet assay are normally higher than those for the FCCE and TUNEL assays and why the Comet assay may have higher predictive values than the other assays that only detect the potential for DNA damage.

This study shows that histone retention is positively associated with sperm DNA damage. Ward (2010) proposed a unique hypothesis on the structural arrangement of histone- and protamine-bound regions of DNA in the mature sperm where protamine-bound DNA is protected from damage by the toroidal compaction and subsequent stacking of toroids, while the histone-bound regions of DNA are vulnerable to degradation by endonucleases and oxidative stress mediated damage (Domínguez et al., 2011). This structural packaging may help to explain our results and those of other studies showing a positive correlation between histone retention and sperm DNA damage (Aoki et al.,

2005b; Garcia-Peiro et al., 2011). In support of this hypothesis we also observed a significant correlation between histone retention and total protamine and P2 content.

A number of studies have shown an association between the quality of chromatin packing in sperm and fertility status of men, and the deteriorating effect of abnormal chromatin packing on ART outcomes (Nasr-Esfahani et al., 2001; Esterhuizen et al., 2002; Razavi et al., 2003). In support of this, we observed a significant increase in sperm DNA damage with a reduction in protamine content. In addition, the P1 and P2 content was lower in men with sperm DNA damage above the threshold values. Protamines facilitate strong intermolecular attraction between the positively charged protamine and the negatively charged DNA to yield a compact DNA–protamine structure (Aoki and Carrell, 2003). A close association between sperm DNA integrity and protamine suggests that the damage may be due to a defective spermiogenesis process (Evenson et al., 2000). Previously it has been shown that protamines play a major role in protecting sperm chromatin from damage, and abnormalities in protamine content may render the sperm DNA vulnerable to damage (Aoki et al., 2006b).

The present study evaluates the relationship between sperm nuclear proteins and ART outcomes. Embryo quality appeared to be affected by P2 content, whereas fertilization and clinical pregnancy were not affected in patients with abnormal protamine content or ratio. We did not observe any significant association between normal and abnormal categories of protamine content or ratio with ART outcomes. These

results are consistent with studies published earlier by our group and others showing fewer associations between abnormal protamine expression and ART outcomes (Carrell and Liu, 2001; Aoki and Carrell, 2003; Razavi et al., 2003; Aoki et al., 2005a). It does not appear as if normal protamination is required for normal fertilization, because ICSI with round spermatids has been shown to produce chromatin decondensation and pronucleus formation (Ahmadi and Ng, 1999). In contrast to these results, some studies have concluded that alteration in protamine content can affect fertilization and embryo quality, which subsequently may affect implantation and pregnancy outcome (Nasr-Esfahani et al., 2004).

In contrast to protamines, histone retention analysed by the aniline blue assay showed an adverse effect on embryo development and clinical pregnancy. Our results are consistent with those of Hammadeh et al. (1998) showing that chromatin condensation visualized by aniline blue staining is a good predictor of ART outcomes. We also observed a strong positive correlation between histone staining and sperm DNA damage analysed by the Comet, TUNEL and FCCE assays and a negative correlation between histone retention and protamine content. We hypothesize that abnormal histone retention may result in reduced chromatin condensation. Subsequently, the DNA nicks are normally repaired by this same enzyme prior to completion of spermiogenesis (Laberge and Boissonneault, 2005). If the replacement of histones by protamines is incomplete, the nicks may not be repaired resulting in sperm with DNA damage (Muratori et al., 2006).

Although there has been a significant amount of research associating sperm DNA damage with ART outcomes, the results are controversial (Micinski et al., 2009; Nijs et al., 2009, 2011; Tavalaei et al., 2009; Aven-dano et al., 2010; Speyer et al., 2010; Kennedy et al., 2011; Meseguer et al., 2011; Simon et al., 2011a; Breznik et al., 2013; Dar et al., 2013). The meta-analysis of Zini and Sigman (2009) and of Collins et al. (2008) found a weak association of sperm DNA damage against ART outcomes. Whereas the meta-analysis of Li et al. (2006) comparing sperm DNA damage measured by TUNEL and FCCE indicated that clinical pregnancy rates decreased significantly for patients with high sperm DNA damage as assessed by TUNEL assay, no such correlations were observed with FCCE. Such conflicts in the literature are probably due to differences in methodology, and our understanding of the effect of sperm DNA damage on reproductive outcomes is far from complete. To date all DNA damage tests are assumed to provide the same value in correlating sperm DNA damage with ART outcomes (Collins et al., 2008; Zini and Sigman, 2009). However, the currently available sperm DNA tests measure different aspects of DNA damage and have variable levels of prognostic value (Lewis, 2013). Therefore, a large cross-sectional study comparing all the methods on the same population is necessary to reach a more consistent conclusion.

In this study, we analysed sperm DNA damage using three methods (Comet, TUNEL and FCCE—SCSA<sup>®</sup> protocol) in men undergoing ART and we associated the level of sperm DNA damage with their clinical outcomes. We observed a negative correlation between sperm DNA damage and fertilization rate with the Comet and TUNEL assays. In addition, a significant decrease in the fertilization rate was observed when sperm DNA damage was above the threshold value using Comet and TUNEL assays. Such correlations were observed following the IVF insemination method but not after ICSI treatment. However, no significant correlations were observed with DNA damage analysed by the FCCE assay, either after IVF or ICSI. This is in

agreement with numerous studies showing a marked negative correlation between sperm DNA damage and fertilization rate after IVF based on the Comet assay (Simon et al., 2010, 2011a,b, 2012; Simon and Lewis, 2011) and TUNEL assay (Huang et al., 2005; Payne et al., 2005; Borini et al., 2006; Bakos et al., 2007; Breznik et al., 2013). In contrast, several studies have found no correlation between sperm DNA damage and IVF fertilization rate (Benchaib et al., 2007; Frydman et al., 2008; Esbert et al., 2011). However the results do agree with those from Borini et al. (2006) and Breznik et al. (2013) showing that sperm DNA damage negatively affects fertilization rates following IVF but not ICSI treatment. The adverse effects of DNA damage seen here may be due to abnormal chromatin packing in sperm which is associated with high DNA damage (Simon et al., 2011b) and also with a failure of sperm DNA to decondense post-fertilization (Sakkas et al., 1996; Lopes et al., 1998).

Our study also showed a significant correlation between sperm DNA damage and embryo quality, and this relationship was true with the Comet assay. In addition, a significant decrease in embryo quality was observed when sperm DNA damage was above the threshold value of the Comet assay. These results are in disagreement with the findings of Braude et al. (1988) who showed that DNA damage in sperm is not important in early embryogenesis, and that until the 4–8 cell embryonic stage the oocyte genome controls early development. Only after this stage does the embryonic genome become transcriptionally active with the paternal genome contributing to further embryo development. In contrast, our study shows that sperm DNA damage adversely impacts embryo quality as early as Day 2, while the negative impact of sperm DNA damage is even more pronounced during the blastocyst stage.

We report that sperm DNA damage assessed by TUNEL and FCCE assays was not associated with embryo or blastocyst quality. Our results are consistent with other studies showing no significant association between embryo development and sperm DNA damage assessed by TUNEL (Bakos et al., 2007; Frydman et al., 2008; Esbert et al., 2011) and SCSA (Payne et al., 2005; Bungum et al., 2007; Lin et al., 2008; Micinski et al., 2009; Speyer et al., 2010). In contrast, a few studies have reported a significant association between embryo development and sperm DNA damage (Saleh et al., 2003; Seli et al., 2004; Virro et al., 2004; Benchaib et al., 2007). These discrepancies are probably due to the type of DNA damage assays used, as these assays measure different aspects of DNA damage. Secondly, the sensitivity of TUNEL and FCCE assays to detect DNA damage are low compared with Comet assay (Ribas-Maynou et al., 2013) which may be attributed to the fact that decondensation of the sperm nucleus is necessary to measure the total DNA damage (de Luliis et al., 2009). The threshold value for the Comet assay (82%) is significantly higher than those of TUNEL (10%) and FCCE (27%) assays owing to the sensitivity of the Comet assay where all double-strand and single-strand breaks are revealed after complete decondensation while for the other assays only peripheral DNA damage is accessible.

This study shows that sperm DNA damage correlates with implantation efficiency. Our results are consistent with those of studies showing a high implantation rate in patients when sperm DNA damage is below the threshold value (Frydman et al., 2008). Kennedy et al. (2011) was the first study to examine the association between sperm DNA damage and multiple pregnancy rates, and reported significantly lower sperm DNA damage in men from couples having triplet pregnancies compared with those who had a spontaneous abortion. To date, few

studies have associated the relationship between sperm DNA damage and the incidence of multiple implantation or multiple births in couples undergoing ART. This is consistent with our earlier results in which we found that sperm DNA damage affected early embryo development, and in patients with low sperm DNA damage >50% of the embryos developed into blastocysts. These results indicate that sperm DNA damage may affect implantation rates and be associated with rates of spontaneous pregnancy loss (Benchaib et al., 2007; Ozmen et al., 2007; Frydman et al., 2008; Lin et al., 2008), a phenomenon termed 'late paternal effect' by Tesarik et al. (2004). Therefore, we could speculate that decision-making in ART could be adjusted based on sperm DNA damage to reduce the chances of multiple births.

In this study, couples that achieved a clinical pregnancy following ART had significantly lower sperm DNA damage than couples that did not. The association was significant when sperm DNA damage was assessed by Comet and TUNEL assays, but not with FCCE. Our results on clinical pregnancies were consistent with previous reports using the Comet assay (Simon et al., 2010, 2011a,b, 2012), whereas using the TUNEL and FCCE assays, the literature remains unclear on the impact of sperm DNA damage on clinical pregnancies after ART (Huang et al., 2005; Payne et al., 2005; Boe-Hansen et al., 2006; Borini et al., 2006; Bakos et al., 2007; Benchaib et al., 2007; Bungum et al., 2008; Frydman et al., 2008; Lin et al., 2008; Micinski et al., 2009; Nijs et al., 2009, 2011; Avendano et al., 2010; Esbert et al., 2011). An explanation for the conflicts in the reported literature may be due to patient inclusion factors. Most of the studies have included couples with female factors; therefore the effect of sperm DNA damage on pregnancy outcome is compromised by female infertility factors (Simon et al., 2011a). For example, in the studies Payne et al. (2005), Frydman et al. (2008), Nijs et al. (2009) and Meseguer et al. (2011) more than half of the couples had been diagnosed with female infertility. The inclusion of patients with female infertile factor could reduce the prognostic value of the sperm DNA tests (Giwercman et al., 2009).

To assess the clinical usefulness of the sperm DNA tests, their threshold value and ORs must be calculated. Previous studies on the Comet assay have reported a threshold value of 56% (Simon et al., 2010) and 52% (Simon et al., 2011a) by calculating the mean across the DNA damage values for each sperm. However, in this study for the first time a threshold value for Comet assay was calculated by assessing the percentage of sperm with DNA damage. We report a threshold value of 82% of sperm with DNA damage, which was calculated across 238 subjects. This value also corresponds to the highest OR to obtain a successful clinical pregnancy. A 10% threshold value was calculated for the TUNEL assay, which was previously reported by Borini et al. (2006) and Ozmen et al. (2007).

The ORs to predict successful pregnancies after ART were 7.00 for Comet, 3.38 for TUNEL and 1.32 for FCCE. This OR for Comet is higher than the overall ORs obtained by the meta-analysis when all the studies were combined (Collins et al., 2008; Zini and Sigman, 2009), suggesting an improved efficiency of the alkaline Comet assay compared with the SCSA and TUNEL assays which were included in the meta-analysis. Interestingly, the TUNEL assay resulted in a lower OR but did show a statistically significant difference in pregnancy outcome. This may be due to the fact that both Comet and TUNEL assays measure the direct level of DNA damage (Martins et al., 2007), whereas SCSA measures the susceptibility of the sperm DNA to damage (Evenson and Jost, 2000).

When the three assays were compared to identify the tests with high prognostic value to predict clinical pregnancies, Comet and FCCE assays showed higher sensitivity but the specificity was higher using Comet and TUNEL assays. The results of the OR was also confirmed by the ROC curve where Comet (0.648) and TUNEL (0.629) assays showed the area under the curve to differentiate couples that had a successful pregnancy from those who did not. The DNA damage assays had a low positive predictive value (52–68.5%). The false positives may be related to the presence of female infertility factors in the couples undergoing ART treatment. Approximately 40% of the couples enrolled in this study showed the presence of female infertility issues which could have prevented a positive pregnancy despite a low level of sperm DNA damage. Men with sperm DNA damage above the threshold values had an increased relative risk of not achieving a clinical pregnancy for Comet (1.89) and TUNEL (1.72) assays, compared with the FCCE assay (1.04). In addition, the positive and negative predictive values of Comet and TUNEL assays were higher compared with FCCE assay, once again indicating that these two tests have higher prognostic value than the FCCE assay. Our results are in agreement with previously reported studies showing that the DFI does not provide sufficient information about the complete extent of DNA damage in sperm (Frazer, 2005), which may explain its low prognostic value. Another explanation for this effect may be the sample size in our study, where the Comet and TUNEL assays were used in more samples than the FCCE assay.

In conclusion, abnormalities in histone and protamine content were associated with increased sperm DNA damage. The level of sperm DNA damage measured by the Comet assay was comparable to the TUNEL assay but not to FCCE. In the Comet assay, the method of analysing the percentage of sperm with DNA damage is more effective when compared with the mean level of DNA damage across each sperm. The sensitivity and specificity of the alkaline Comet assay in predicting ART outcome is higher compared with TUNEL and FCCE assays. This study provides robust evidence that sperm DNA damage as a useful biomarker in helping to predict ART outcome, and assessment of DNA damage in sperm using the alkaline Comet and TUNEL assays provide the sensitivity and specificity needed to best predict ART success. The development of novel diagnostic approaches that allow non-invasive evaluation of individual sperm to select sperm with minimal DNA damage could be a potentially valuable tool to improve ART success.

## Acknowledgements

The authors wish to thank the UCRM IVF unit and laboratory staff for their commitment and support to this project, for preparing tissue samples and helping to collect data on ART outcomes.

## Authors' roles

L.S. is a postdoctoral fellow and was responsible for performing sperm DNA damage assays, statistical analysis and writing the manuscript. L.L. and S.G. performed the protamine quantification and aniline blue assays. K.M. was responsible for collecting ART data from patients enrolled in the study. J.H. and K.I.A. contributed to the writing of the manuscript and analysis of results. B.E. was responsible for consenting the study subjects. D.T.C. is the principle investigator for this study and is responsible for design of the study. D.T.C. is the head of ART unit and is the corresponding author for this manuscript.

## Funding

No personal or direct financial support has been received for any of this work. There has been no contribution to study design, results analysis or writing of the manuscript from any funding source. Provision of laboratory and research staff, who have contributed to this work, has been supported by School of Medicine University of Utah.

## Conflict of interest

D.T.C. has received no personal financial support for this work. L.S., L.L., K.M., S.G., J.H., K.I.A. and B.E. have no conflict of interest.

## References

- Ahmadi A, Ng SC. Destruction of protamine in human sperm inhibits sperm binding and penetration in the zona-free hamster penetration test but increases sperm head decondensation and male pronuclear formation in the hamster-ICSI assay. *J Assist Reprod Genet* 1999; **16**:128–132.
- Aitken RJ. Sperm function tests and fertility. *Int J Androl* 2006; **29**:69–75.
- Alizadeh NH, Hossein M, Ashraf A. Correlation of sperm DNA damage with protamine deficiency in Iranian subfertile men. *Reprod Biomed Online* 2009; **18**:479–485.
- Angelopoulou R, Plastira K, Msaouel P. Spermatozoal sensitive biomarkers to defective protaminosis and fragmented DNA. *Reprod Biol Endocrinol* 2007; **5**:36. 15 pp.
- Aoki VW, Carrell DT. Human protamines and the developing spermatid: their structure, function, expression and relationship with male infertility. *Asian J Androl* 2003; **5**:315–324.
- Aoki VW, Liu L, Carrell DT. Identification and evaluation of a novel sperm protamine abnormality in a population of infertile males. *Hum Reprod* 2005a; **20**:1298–1306.
- Aoki VW, Moskovtsev SI, Willis J, Liu L, Mullen JB, Carrell DT. DNA integrity is compromised in protamine-deficient human sperm. *J Androl* 2005b; **26**:741–748.
- Aoki VW, Emery BR, Carrell DT. Global sperm deoxyribonucleic acid methylation is unaffected in protamine-deficient infertile males. *Fertil Steril* 2006a; **86**:1541–1543.
- Aoki VW, Emery BR, Liu L, Carrell DT. Protamine levels vary between individual sperm cells of infertile human male and correlate with viability and DNA integrity. *J Androl* 2006b; **27**:890–898.
- Avendano C, Franchi A, Duran H, Oehninger S. DNA fragmentation of normal spermatozoa negatively impacts embryo quality and intracytoplasmic sperm injection outcome. *Fertil Steril* 2010; **94**:549–557.
- Bakos HW, Thompson JG, Feil D, Lane M. Sperm DNA damage is associated with assisted reproductive technology pregnancy. *Int J Androl* 2007; **31**:518–526.
- Benchaib M, Lornage J, Mazoyer C, Lejeune H, Salle B, Guerin JF. Sperm deoxyribonucleic acid fragmentation as a prognostic indicator of assisted reproductive technology outcome. *Fertil Steril* 2007; **87**:93–101.
- Bianchi PG, Manicardi GC, Bizzaro D, Bianchi U, Sakkas D. Effect of deoxyribonucleic acid protamination on fluorochrome staining and *in situ* nick-translation of murine and human mature spermatozoa. *Biol Reprod* 1993; **49**:1083–1088.
- Boe-Hansen GB, Fedder J, Ersboll AK, Christensen P. The sperm chromatin structure assay as a diagnostic tool in the human fertility clinic. *Hum Reprod* 2006; **21**:1576–1582.
- Boitrelle F, Ferfour F, Petit JM, Segretain D, Tourain C, Bergere M, Bailly M, Vialard F, Albert M, Selva J. Large human sperm vacuoles observed in motile spermatozoa under high magnification: nuclear thumbprints linked to failure of chromatin condensation. *Hum Reprod* 2011; **7**:1650–1658.
- Borini A, Tarozzi N, Bizzaro D, Bonu MA, Fava L, Flamigni C, Coticchio G. Sperm DNA fragmentation: paternal effect on early post-implantation embryo development in ART. *Hum Reprod* 2006; **21**:2876–2881.
- Braude P, Bolton V, Moore S. Human gene expression first occurs between the four and eight-cell stages of preimplantation development. *Nature* 1988; **332**:459–461.
- Breznik BP, Kovacic B, Vlasisavljevic V. Are sperm DNA fragmentation, hyperactivation and hyaluronan-binding ability predictive for fertilization and embryo development in *in vitro* fertilization and intracytoplasmic sperm injection? *Fertil Steril* 2013; **99**:1233–1241.
- Bungum M, Humaidan P, Spano M, Jepson K, Bungum L, Giwercman A. The predictive value of sperm chromatin structure assay (SCSA) parameters for the outcome of intrauterine insemination, IVF and ICSI. *Hum Reprod* 2004; **19**:1401–1408.
- Bungum M, Humaidan P, Axmon A, Spano M, Bungum L, Erenpreiss J, Giwercman A. Sperm DNA integrity assessment in prediction of assisted reproduction technology outcome. *Hum Reprod* 2007; **22**:174–179.
- Bungum M, Spano M, Humaidan P, Eleuteri P, Rescia M, Giwercman A. Sperm chromatin structure assay parameters measured after density gradient centrifugation are not predictive for the outcome of ART. *Hum Reprod* 2008; **23**:4–10.
- Carrell DT, Liu L. Altered protamine 2 expression is uncommon in donors of known fertility, but common among men with poor fertilizing capacity, and may reflect other abnormalities of spermiogenesis. *J Androl* 2001; **22**:604–610.
- Carrell DT, Peterson CM, Jones KP, Hatasaka HH, Udoff LC, Cornwell CE, Thorp C, Kuneck P, Erickson L, Campbell B. A simplified coculture system using homologous, attached cumulus tissue results in improved human embryo morphology and pregnancy rates during *in vitro* fertilization. *J Assist Reprod Genet* 1999; **16**:344–349.
- Carrell DT, Peterson CM, Jones KP, Hatasaka HH, Erickson L, Campbell B. Sperm DNA fragmentation is increased in couples with unexplained recurrent pregnancy loss. *Arch Androl* 2003; **49**:49–55.
- Castillo J, Simon L, de Mateo S, Balleascá JL, Lewis SEM, Oliva R. Protamine/DNA ratios and DNA damage in neat and density selected sperm cells from infertile patients. *J Androl* 2011; **32**:324–332.
- Chiamchanya C, Kaewoonual N, Visutakul P, Manochantr S, Chaiya J. Comparative study of the effects of three semen preparation media on semen analysis, DNA damage and protamine deficiency, and the correlation between DNA integrity and sperm parameters. *Asian J Androl* 2010; **12**:271–277.
- Chohan KR, Griffin JT, Lafromboise M, De Jonge CJ, Carrell DT. Comparison of chromatin assays for DNA fragmentation evaluation in human sperm. *J Androl* 2006; **27**:53–59.
- Collins JA, Barnhart KT, Schlegel PN. Do sperm DNA integrity tests predict pregnancy with *in vitro* fertilization? *Fertil Steril* 2008; **89**:823–831.
- Dar S, Grover SA, Moskovtsev SI, Swanson S, Baratz A, Librach CL. *In vitro* fertilization–intracytoplasmic sperm injection outcome in patients with a markedly high DNA fragmentation index (>50%). *Fertil Steril* 2013; **100**:75–80.
- de Iuliis GN, Thomson LK, Mitchell LA, Finnie JM, Koppers AJ, Hedges A, Nixon B, Aitken RJ. DNA damage in human spermatozoa is highly correlated with the efficiency of chromatin remodeling and the formation of 8-hydroxy-20-deoxyguanosine, a marker of oxidative stress. *Biol Reprod* 2009; **81**:517–524.
- Dominguez K, Arca CDR, Ward WS. The relationship between chromatin structure and DNA damage in mammalian spermatozoa. In: Zini A, Agarwal A (eds). *Sperm Chromatin: Biological and Clinical Applications in Male Infertility and Assisted Reproduction*. New York: Springer, 2011.

- Donnelly ET, McClure N, Lewis SE. The effect of ascorbate and alpha-tocopherol supplementation *in vitro* on DNA integrity and hydrogen peroxide-induced DNA damage in human spermatozoa. *Mutagenesis* 1999;**14**:505–512.
- Erenpreiss J, Jepson K, Giwercman A, Tsarev I, Erenpreisa J, Spano M. Toluidine blue cytometry test for sperm DNA conformation: comparison with the flow cytometric sperm chromatin structure and TUNEL assays. *Hum Reprod* 2004;**19**:2277–2282.
- Esbert M, Pacheco A, Vidal F, Florensa M, Riqueros M, Ballesteros A, Garrido N, Calderon G. Impact of sperm DNA fragmentation on the outcome of IVF with own or donated oocytes. *Reprod Biomed Online* 2011;**23**:704–710.
- Esterhuizen AD, Franken DR, Becker PJ, Lourens JGH, Miller II, van Rooyen LH. Defective sperm decondensation: a cause for fertilization failure. *Andrologia* 2002;**34**:1–7.
- Evenson D, Jost L. Sperm chromatin structure assay is useful for fertility assessment. *Methods Cell Sci* 2000;**22**:169–189.
- Evenson DP, Jost LK, Marshall D, Zinaman MJ, Clegg E, Purvis K, de Angelis P, Claussen OP. Utility of the sperm chromatin structure assay as a diagnostic and prognostic tool in the human fertility clinic. *Hum Reprod* 1999;**14**:1039–1049.
- Evenson DP, Jost LK, Marshall D, Balhorn R. Characteristics of human sperm chromatin structure following an episode of influenza and high fever: A case study. *J Androl* 2000;**21**:739–746.
- Evenson DP, Kaspersen K, Wixon RL. Analysis of sperm DNA fragmentation using flow cytometry and other techniques. *Soc Reprod Fertil Suppl* 2007;**65**:93–113.
- Frazer L. Structural damage to nuclear DNA in mammalian spermatozoa: its evaluation technique and relationship with male infertility. *Pol J Vet Sci* 2005;**7**:311–321.
- Frydman N, Prisant N, Hesters L, Frydman R, Tachdjian G, Cohen-Bacrie P, Fanchin R. Adequate ovarian follicular status does not prevent the decrease in pregnancy rates associated with high sperm DNA fragmentation. *Fertil Steril* 2008;**89**:93–98.
- García-Peiro A, Martínez-Heredia J, Oliver-Bonet M, Abad C, Amengual MJ, Navarro J, Jones C, Coward K, Gosálvez J, Benet J. Protamine 1 to protamine 2 ratio correlates with dynamic aspects of DNA fragmentation in human sperm. *Fertil Steril* 2011;**95**:105–109.
- Giwercman A, Lindstedt L, Larsson M, Bungum M, Spano M, Levine RJ, Rylander L. Sperm chromatin structure assay as an independent predictor of fertility *in vivo*: a case–control study. *Int J Androl* 2009;**32**:1–7.
- Greco E, Scarselli F, Iacobelli M, Rienzi L, Ubaldi F, Ferrero S, Franco G, Anniballo N, Mendoza C, Tesarik J. Efficient treatment of infertility due to sperm DNA damage by ICSI with testicular spermatozoa. *Hum Reprod* 2005;**20**:226–230.
- Hammadeh ME, Stieber M, Haidl G, Schmidt W. Association between sperm cell chromatin condensation, morphology based on strict criteria and fertilization, cleavage, and pregnancy rates in IVF programme. *Andrologia* 1998;**30**:29–35.
- Henkel R, Hoogendijk CF, Bouic PJ, Kruger TF. TUNEL assay and SCSA determine different aspects of sperm DNA damage. *Andrologia* 2010;**42**:305–313.
- Host E, Lindenberg S, Ernst E, Christensen F. DNA strand breaks in human spermatozoa: a possible factor, to be considered in couples suffering from unexplained infertility. *Acta Obstet Gynecol Scand* 1999;**78**:622–625.
- Hotaling JM, Smith JF, Rosen M, Muller CH, Walsh TJ. The relationship between isolated teratozoospermia and clinical pregnancy after *in vitro* fertilization with or without intracytoplasmic sperm injection: a systematic review and meta-analysis. *Fertil Steril* 2011;**95**:1141–1145.
- Huang CC, Lin DPC, Tsao HM, Cheng TC, Liu CH, Lee MS. Sperm DNA fragmentation negatively correlates with velocity and fertilization rates but might not affect pregnancy rates. *Fertil Steril* 2005;**84**:130–140.
- Hughes CM, Lewis SEM, McKelvey-Martin V, Thompson W. Reproducibility of human sperm DNA measurements using the alkaline single cell gel electrophoresis assay. *Mutat Res* 1997;**374**:261–268.
- Kennedy C, Ahlering P, Rodriguez H, Levy S, Sutovsky P. Sperm chromatin structure correlates with spontaneous abortion and multiple pregnancy rates in assisted reproduction. *Reprod Biomed Online* 2011;**22**:272–276.
- Laberge RM, Boissonneault G. On the nature and origin of DNA strand breaks in elongating spermatids. *Biol Reprod* 2005;**73**:289–296.
- Lee TH, Liu CH, Shih YT, Tsao HM, Huang CC, Chen HH, Lee MS. Magnetic-activated cell sorting for sperm preparation reduces spermatozoa with apoptotic markers and improves the acrosome reaction in couples with unexplained infertility. *Hum Reprod* 2010;**25**:839–846.
- Lewis SEM. The place of sperm DNA fragmentation testing in current day fertility management. *Middle East Fertil Soc J* 2013;**18**:78–82.
- Lewis SEM, Simon L. Clinical implications of Sperm DNA damage. *Hum Fertil* 2010;**13**:201–207.
- Li Z, Wang L, Cai J, Huang H. Correlation of sperm DNA damage with IVF and ICSI outcomes: a systematic review and meta-analysis. *J Assist Reprod Genet* 2006;**23**:367–376.
- Lin HH, Lee RK, Li SH, Lu CH, Sun FJ, Hwu YM. Sperm chromatin structure assay parameters are not related to fertilization rates, embryo quality, and pregnancy rates in *in vitro* fertilization and intracytoplasmic sperm injection, but might be related to spontaneous abortion rates. *Fertil Steril* 2008;**90**:352–359.
- Lopes S, Jurisicova A, Casper RF. Gamete-specific DNA fragmentation in unfertilized human oocytes after intracytoplasmic sperm injection. *Hum Reprod* 1998;**13**:703–708.
- Martins CF, Dode MN, Bao SN, Rumpf R. The use of the acridine orange test and the TUNEL assay to assess the integrity of freeze-dried bovine spermatozoa DNA. *Genet Mol Res* 2007;**6**:94–104.
- Mengual L, Balleca JL, Ascaso C, Oliva R. Marked differences in protamine content and P1/P2 ratios in sperm cells from Percoll fractions between patients and controls. *J Androl* 2003;**24**:438–447.
- Meseguer M, Santiso R, Garrido N, García-Herrero S, Remohí J, Fernández JL. Effect of sperm DNA fragmentation on pregnancy outcome depends on oocyte quality. *Fertil Steril* 2011;**95**:124–128.
- Micinski P, Pawlicki K, Wielgus E, Bochenek M, Tworkowski I. The sperm chromatin structure assay (SCSA) as prognostic factor in IVF/ICSI program. *Reprod Biol* 2009;**9**:65–70.
- Morris ID, liott S, Dixon L, Brison DR. The spectrum of DNA damage in human sperm assessed by single cell gel electrophoresis (Comet assay) and its relationship to fertilization and embryo development. *Hum Reprod* 2002;**17**:990–998.
- Muratori M, Marchiani S, Maggi M, Forti G, Baldi E. Origin and biological significance of DNA fragmentation in human spermatozoa. *Front Biosci* 2006;**11**:1491–1499.
- Muriel L, Garrido N, Fernández JL, Remohí J, Pellicer A, de los Santos MJ, Meseguer M. Value of the sperm DNA fragmentation level, measured by the sperm chromatin dispersion (SCD) test, in the IVF and ICSI outcome. *Fertil Steril* 2006;**85**:371–383.
- Nasr-Esfahani MH, Razavi S, Mardani M. Relation between different human sperm nuclear maturity tests and *in vitro* fertilization. *J Assist Reprod Genet* 2001;**18**:199–205.
- Nasr-Esfahani MH, Razavi S, Mozdarani H, Mardani M, Azvagi H. Relationship between protamine deficiency with fertilization rate and incidence of sperm premature chromosomal condensation post-ICSI. *Andrologia* 2004;**36**:95–100.
- Nasr-Esfahani MH, Salehi M, Razavi S, Anjilshoa M, Rozahani S, Moulavi F, Mardani M. Effect of sperm DNA damage and sperm protamine deficiency on fertilization and embryo development post-ICSI. *Reprod Biomed Online* 2005;**11**:198–205.

- Nasr-Esfahani MH, Razavi S, Travalae M. Failed fertilization after ICSI and spermogenic defects. *Fertil Steril* 2008a;**89**:892–898.
- Nasr-Esfahani MH, Razavi S, Vahdati AA, Fathi F, Tavalae M. Evaluation of sperm selection procedure based on hyaluronic acid binding ability on ICSI outcome. *J Assist Reprod Genet* 2008b;**25**:197–203.
- Nicopoulos JDM, Ramsay JWA, Almeida P, Gilling-Smith C. (2005) Can the outcome of intracytoplasmic sperm injection be predicted by genetic screening of spermatozoa? *Abstracts of the 21st annual meeting of the European Society for Human Reproduction and Embryology*. June 19–22, 2005, Copenhagen, Denmark, 1198.
- Nijs M, Creemers E, Cox A, Franssen K, Janssen M, Vanheusden E, de Jonge C, Ombelet W. Chromomycin A3 staining, sperm chromatin structure assay and hyaluronic acid binding assay as predictors for assisted reproductive outcome. *Reprod Biomed Online* 2009;**19**:671–684.
- Nijs M, De Jonge C, Cox A, Janssen M, Bosmans E, Ombelet W. Correlation between male age, WHO sperm parameters, DNA fragmentation, chromatin packaging and outcome in assisted reproduction technology. *Andrologia* 2011;**43**:174–179.
- Nili HA, Mozdarani H, Aleyasin A. Correlation of sperm DNA damage with protamine deficiency in Iranian subfertile men. *Reprod Biomed Online* 2009;**18**:479–485.
- Ozmen B, Caglar GS, Koster F, Schopper B, Diedrich K, Al-Hasani S. Relationship between sperm DNA damage, induced acrosome reaction and viability in ICSI patients. *Reprod Biomed Online* 2007;**15**:208–214.
- Pacey AA. Assessment of male factor. *Best Pract Res Clin Obstet Gynaecol* 2012;**26**:739–746.
- Payne JF, Rabum DJ, Couchman GM, Price TM, Jamison MG, Walmer DK. Redefining the relationship between sperm deoxyribonucleic acid fragmentation as measured by the sperm chromatin structure assay and outcomes of assisted reproductive techniques. *Fertil Steril* 2005;**84**:356–364.
- Plastira K, Msaouel P, Angelopoulou R, Zanioti K, Plastiras A, Pothos A, Bolaris S, Papanisteidis N, Mantas D. The effects of age on DNA fragmentation, chromatin packaging and conventional semen parameters in spermatozoa of oligoasthenoteratozoospermic patients. *J Assist Reprod Genet* 2007;**24**:437–443.
- Razavi S, Nasr-Esfahani MH, Mardani M, Mafi M, Moghdam A. Effect of human sperm chromosome anomalies on fertilization outcome post-ICSI. *Andrologia* 2003;**35**:238–243.
- Ribas-Maynou J, García-Peiró A, Fernández-Encinas A, Abad C, Amengual MJ, Prada E, Navarro J, Benet J. Comprehensive analysis of sperm DNA fragmentation by five different assays: TUNEL assay, SCSA, SCD test and alkaline and neutral Comet assay. *Andrology* 2013;**1**:715–722.
- Rosenbusch BE. Frequency and patterns of premature sperm chromosome condensation in oocytes failing to fertilize after intracytoplasmic sperm injection. *J Assist Reprod Genet* 2000;**17**:253–259.
- Sakkas D, Urner F, Bianchi P, Bizzaro D, Wagner I, Jaquenoud N, Manicardi C, Campana A. Sperm chromatin anomalies can influence decondensation after intracytoplasmic sperm injection. *Hum Reprod* 1996;**11**:837–843.
- Saleh RA, Agarwal A, Nada EA, El-Tonsy MH, Sharma RK, Meyer A, Nelson DR, Thomas AJ. Negative effects of increased sperm DNA damage in relation to seminal oxidative stress in men with idiopathic and male factor infertility. *Fertil Steril* 2003;**79**:1597–1606.
- Seli E, Gardner DK, Schoolcraft WB, Moffatt O, Sakkas D. Extent of nuclear DNA damage in ejaculated spermatozoa impacts on blastocyst development after *in vitro* fertilization. *Fertil Steril* 2004;**82**:378–383.
- Simon L, Lewis SEM. Sperm DNA damage or progressive motility: which one is the better predictor of fertilization rates *in vitro*? *Syst Biol Reprod Med* 2011;**57**:133–138.
- Simon L, Brunborg G, Stevenson M, Lutton D, McManus J, Lewis SEM. Clinical significance of sperm DNA damage in assisted reproductive outcome. *Hum Reprod* 2010;**25**:1594–1608.
- Simon L, Lutton D, McManus J, Lewis SEM. Sperm DNA damage measured by the alkaline Comet assay as an independent predictor of male infertility and IVF success. *Fertil Steril* 2011a;**95**:652–657.
- Simon L, Castillo J, Oliva R, Lewis S. The relationship between human sperm protamines, DNA damage and assisted reproductive outcomes. *Reprod Biomed Online* 2011b;**23**:724–734.
- Simon L, Proutski I, Stevenson M, Jennings D, McManus J, Lutton D, Lewis SEM. Sperm DNA damage has negative association with live birth rates after IVF. *Reprod Biomed Online* 2012;**26**:68–78.
- Singh NP, McCoy MT, Tice RR, Schneider EL. A simple technique for quantitation of low levels of DNA damage in individual cells. *Exp Cell Res* 1988;**175**:184–191.
- Spano M, Bonde JP, Hjollund HI, Kolstad HA, Cordelli E, Leter G. Sperm chromatin damage impairs human fertility. The Danish First Pregnancy Planner Study Team. *Fertil Steril* 2000;**73**:43–50.
- Speyer BE, Pizzey AR, Ranieri M, Joshi R, Delhanty JD, Serhal P. Fall in implantation rates following ICSI with sperm with high DNA fragmentation. *Hum Reprod* 2010;**25**:1609–1618.
- Tarozzi N, Nadalini M, Stronati A, Prato LD, Cotichio G, Borini A. Anomalies in sperm chromatin packing: Implications for assisted reproductive treatment. *Reprod Biomed Online* 2009;**18**:486–495.
- Tavalae M, Razavi S, Nasr-Esfahani MH. Influence of sperm chromatin anomalies on assisted reproductive technology outcome. *Fertil Steril* 2009;**91**:1119–1126.
- Tesarik J, Greco E, Mendoza C. Late, but not early, paternal effect on human embryo development is related to sperm DNA fragmentation. *Hum Reprod* 2004;**19**:611–615.
- Tomsu M, Sharma V, Miller D. Embryo quality and IVF treatment outcome may correlate with different sperm comet parameters. *Hum Reprod* 2002;**17**:1856–1862.
- Torregrosa N, Domínguez-Fandos D, Camejo MI, Shirley CR, Meistrich ML, Ballescà JL, Oliva R. Protamine 2 precursors, protamine 1/protamine 2 ratio, DNA integrity and other sperm parameters in infertile patients. *Hum Reprod* 2006;**21**:2084–2089.
- Virro MR, Larson-Cook KL, Evenson DP. Sperm chromatin structure assay (SCSA) parameters are related to fertilization, blastocyst development, and ongoing pregnancy in *in vitro* fertilization and intracytoplasmic sperm injection cycles. *Fertil Steril* 2004;**81**:1289–1295.
- Wang J, Fan HC, Behr B, Quake SR. Genome-wide single-cell analysis of recombination activity and de novo mutation rates in human sperm. *Cell* 2012;**150**:402–412.
- Ward WS. Function of sperm chromatin structural elements in fertilization and development. *Mol Hum Reprod* 2010;**16**:30–36.
- World Health Organization. *WHO Laboratory Manual for the Examination of Human Semen and Sperm-Cervical Mucus Interaction*, 4th edn. Cambridge, UK: Cambridge University Press, 1999.
- Zhang X, Gabriel MS, Zini A. Sperm nuclear histone to protamine ratio in fertile and infertile men: Evidence of heterogeneous subpopulations of spermatozoa in the ejaculate. *J Androl* 2006;**27**:414–420.
- Zini A, Sigman M. Are tests of sperm DNA damage clinically useful? Pros and cons. *J Androl* 2009;**30**:219–229.
- Zini A, Bielecki R, Phang D, Zenzes MT. Correlations between two markers of sperm DNA integrity, DNA denaturation and DNA fragmentation, in fertile and infertile men. *Fertil Steril* 2001;**75**:674–677.
- Zini A, Meriano J, Kader K, Jarvi K, Laskin CA, Cadesky K. Potential adverse effect of sperm DNA damage on embryo quality after ICSI. *Hum Reprod* 2005;**20**:3476–3480.
- Zini A, Boman JM, Belzile E, Ciampi A. Sperm DNA damage is associated with an increased risk of pregnancy loss after IVF and ICSI: systematic review and meta-analysis. *Hum Reprod* 2008;**23**:2663–2668.
